# Supplementary material for: What integrated care means from an older person’s perspective? A scoping review protocol
Source: PubMed Central journal article supplement (PMC5855209; doi:10.1136/bmjopen-2017-019256), 2018-03-08
Supplement: bmjopen-2017-019256supp001.pdf [file bmjopen-2017-019256supp001.pdf]

Appendix 1- PRISMA-P Checklist

| Section and topic                                                                                                                                                                                                                                                                                              | Page number                                                  |
|----------------------------------------------------------------------------------------------------------------------------------------------------------------------------------------------------------------------------------------------------------------------------------------------------------------|--------------------------------------------------------------|
| <b>Administrative Information</b>                                                                                                                                                                                                                                                                              |                                                              |
| Title:<br>Identification<br>Update<br>Registration<br>Authors:<br>Contact<br>Contributions<br>Amendments<br>Support:<br>Sources<br>Sponsor<br>Role of sponsor or funder                                                                                                                                        | 1<br>N/A<br>N/A<br>1<br>9<br>N/A<br>9<br>9<br>9              |
| <b>Introduction</b>                                                                                                                                                                                                                                                                                            |                                                              |
| Rationale<br>Objectives                                                                                                                                                                                                                                                                                        | 4-5<br>5                                                     |
| <b>Methods</b>                                                                                                                                                                                                                                                                                                 |                                                              |
| Eligibility criteria<br>Information sources<br>Search Strategy<br>Study records:<br>Data management<br>Selection process<br>Data collection process<br>Data items<br>Outcomes and prioritization<br>Risk of bias in individual studies<br>Data synthesis<br>Meta-bias(es)<br>Confidence in cumulative evidence | 6-7<br>6-7<br>7-8<br>7-8<br>7<br>8<br>8-9<br>8<br>N/A<br>N/A |
